# Supplementary material for: Methanolic Extract of Ganoderma lucidum Induces Autophagy of AGS Human Gastric Tumor Cells
Source: MDPI journal article supplement (doi:10.3390/molecules201017872), 2015-09-29
Supplement: s1 [file s1]

## Supplementary Material

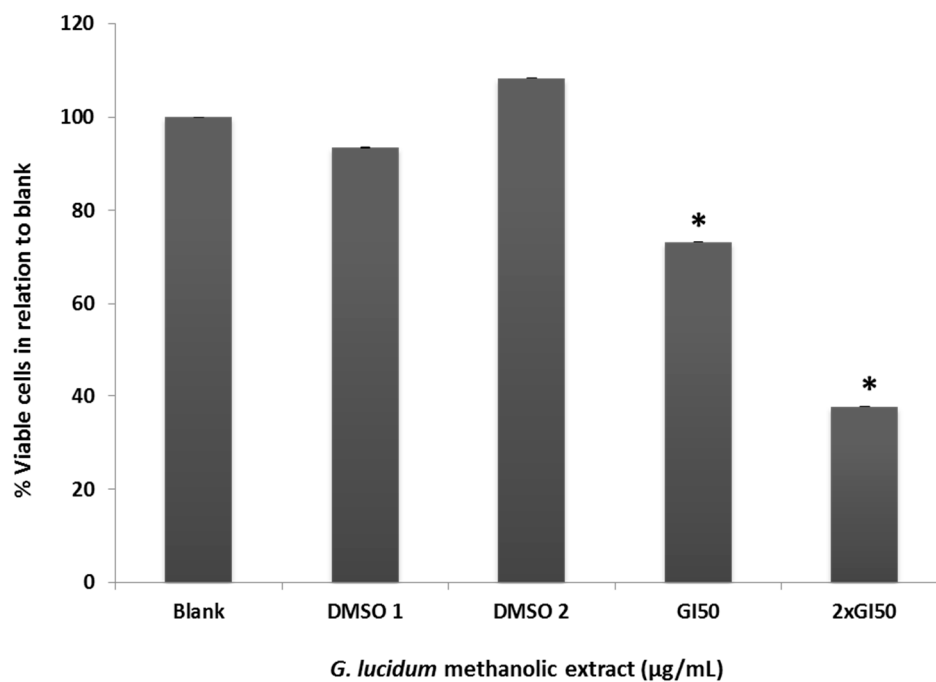

**Figure S1.** Effect of *G. lucidum* methanolic extract on AGS viable cell number. Results were analysed 48 h after incubation with medium only (Blank), with the methanolic extract (at GI<sub>50</sub> and 2 × GI<sub>50</sub> concentrations) or the corresponding volumes of the extract solvent (DMSO). Results are presented as a percentage of viable cells in relation to blank cells and are the mean ± SE of six independent experiments. \*  $p < 0.05$  blank vs. treatment.
